# Supplementary material for: Alcohol Intake Is Associated With Elevated Serum Levels of Selenium and Selenoprotein P in Humans
Source: Front Nutr. 2021 Feb 22;8:633703. doi: 10.3389/fnut.2021.633703 (PMC7937717; doi:10.3389/fnut.2021.633703)
Supplement: Supplementary file 2 [file Table_1.xlsx]

## Sheet: Figure 1
Figure 1. Serum selenium / selenoprotein P levels in each group of alcohol intake Serum level of selenium (i, ii) and selenoprotein P (iii, iv) in men (i, iii) and women (ii, iv). In box-plots, center lines show the medians, and box limits indicate the 25th and 75th percentiles; whiskers extend 1.5x the interquartile range from the 25th and 75th percentiles; data points are plotted as dots. *, p<…

## Sheet: Figure 2a
Figure 2a. Serum levels of selenium and selenoprotein P in participants with different alcohol intake levels and different liver enzyme levels. Serum levels of selenium in participants according to various levels of log AST (i, v), log ALT (ii, vi), log γGTP (iii, vii), and fatty liver by ultrasonography (iv, viii) in men (i~iv) and women (v~viii). In box-plots, center lines show the medians, and…

## Sheet: Figure 2b
Figure 2b. Serum levels of selenoprotein P in participants with different alcohol intake levels and different liver enzyme levels. Serum levels of selenoprotein P in participants according to various levels of log AST (i, v), log ALT (ii, vi), log γGTP (iii, vii), and fatty liver by ultrasonography (iv, viii) in men (i~iv) and women (v~viii). In box-plots, center lines show the medians, and box l…
